# Supplementary material for: Brown fat activation reduces hypercholesterolaemia and protects from atherosclerosis development
Source: PubMed Central journal article supplement (PMC4366535; doi:10.1038/ncomms7356), 2015-03-10
Supplement: ncomms7356-s1.pdf [file ncomms7356-s1.pdf]

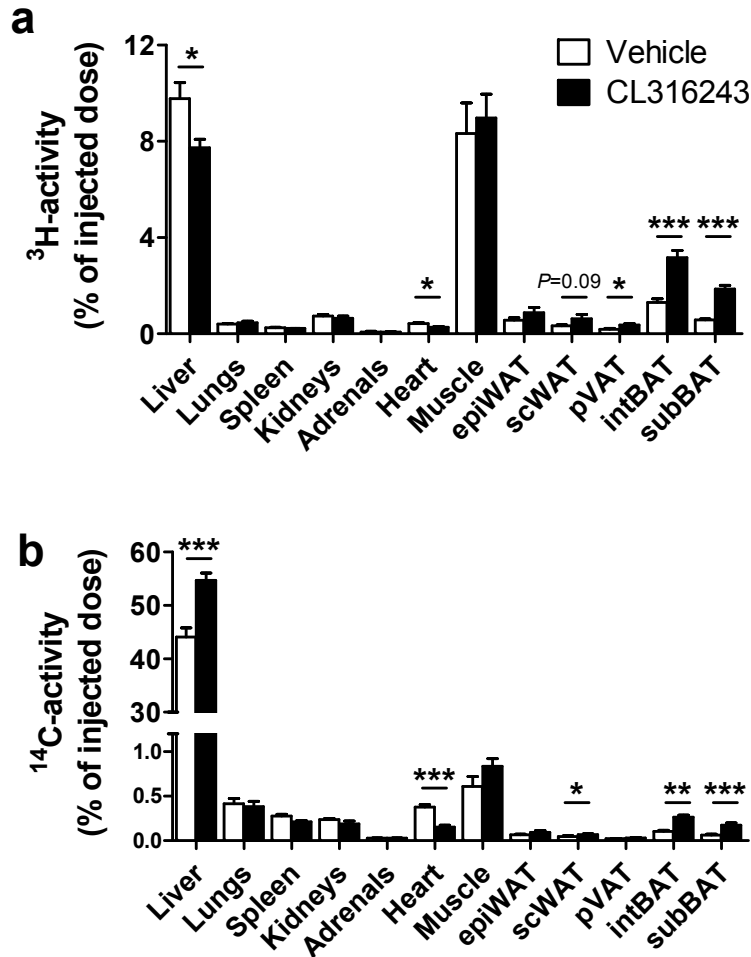

**Supplementary Fig. 1. BAT activation enhances lipolytic processing and hepatic clearance of lipoproteins.**

*E3L.CETP* mice were fed a Western-type diet and treated with vehicle or the  $\beta$ 3-AR agonist CL316243 for 8 consecutive days. Fasted mice were injected with glycerol tri $^3$ H]oleate- and [ $^{14}$ C]cholesteryl oleate-labeled VLDL-mimicking emulsion particles and after 15 min uptake of (a)  $^3$ H-label and (b)  $^{14}$ C-label was determined in the indicated tissues. Data are expressed as percentage  $^3$ H- or  $^{14}$ C-activity of the injected dose per total tissue, with an exception for subcutaneous WAT (scWAT; determined as uptake in 2 representative fat pads) and perivascular adipose tissue (pVAT; determined as uptake in a representative part surrounding the aorta). EpiWAT, epididymal WAT; subBAT, subscapular BAT; intBAT, interscapular BAT. Values are means  $\pm$  S.E.M. (n=5-7 per group). \* $P$ <0.05, \*\* $P$ <0.01, \*\*\* $P$ <0.001 (unpaired two-tailed Student's t-test).

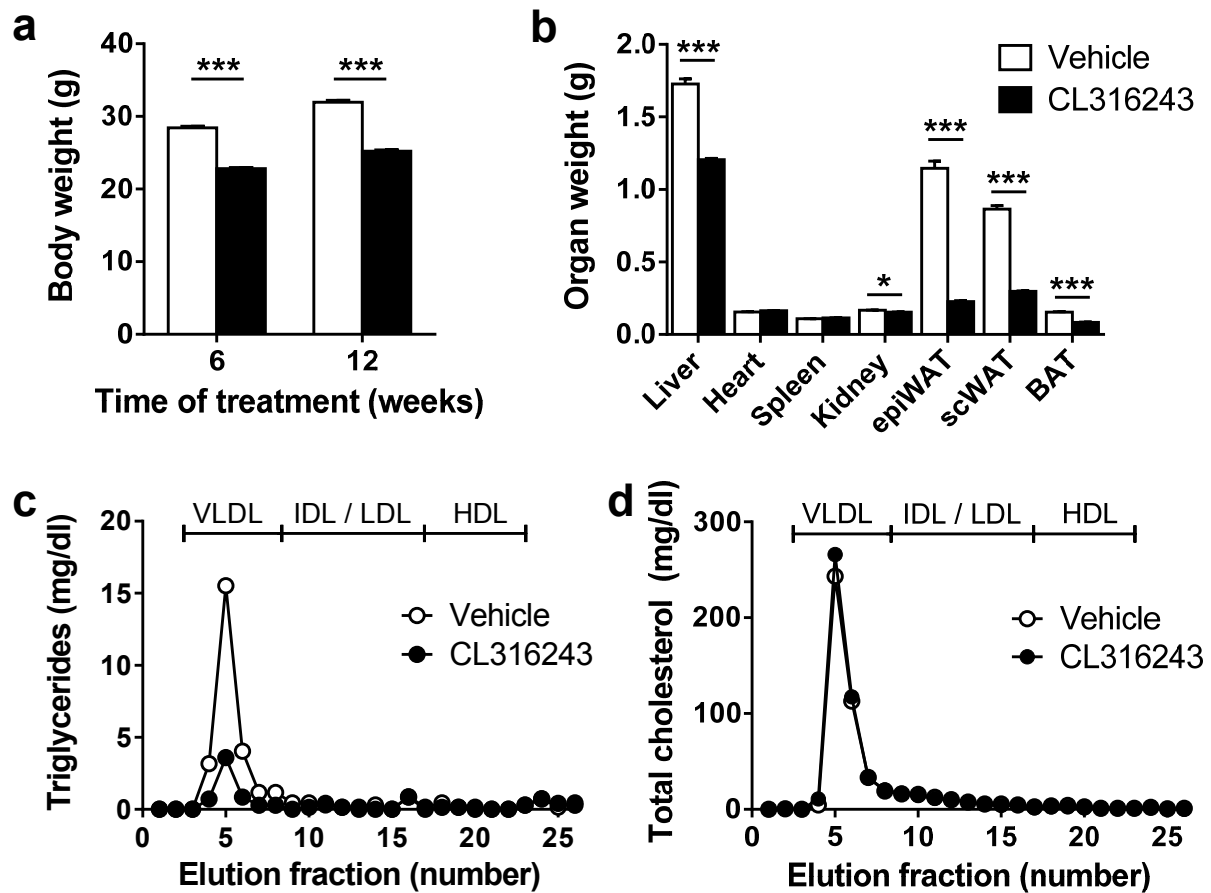

**Supplementary Fig. 2. BAT activation in *Apoe*<sup>-/-</sup> mice reduces fat mass and plasma triglycerides, but not total cholesterol.**

*Apoe*<sup>-/-</sup> mice were fed a Western-type diet and treated with vehicle or the  $\beta$ 3-AR agonist CL316243, pair-fed to the vehicle-treated group, during 12 weeks. (a) Body weight was determined after 6 and 12 weeks of treatment. (b) Organ weight was determined after necropsy at week 12 (B). The distribution of (c) triglycerides and (d) cholesterol over lipoproteins was determined at week 12 in fasted plasma samples that were pooled per group. Values are means  $\pm$  S.E.M. (n=9-10 per group). \* $P$ <0.05, \*\*\* $P$ <0.001 (unpaired two-tailed Student's t-test).

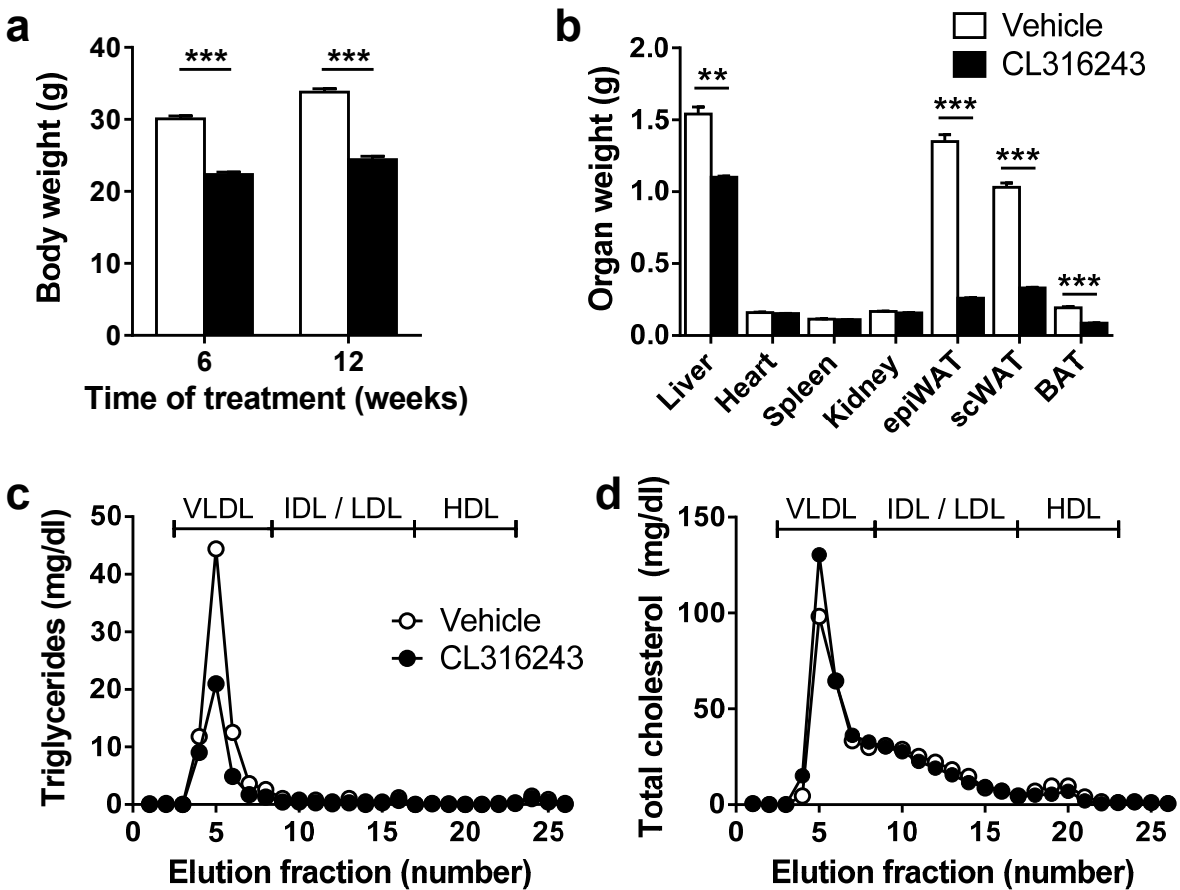

**Supplementary Fig. 3. BAT activation in *Ldlr*<sup>-/-</sup> mice reduces fat mass and plasma triglycerides, but not total cholesterol.**

*Ldlr*<sup>-/-</sup> mice were fed a Western-type diet and treated with vehicle or the  $\beta$ 3-AR agonist CL316243, pair-fed to the vehicle-treated group, during 12 weeks. (a) Body weight was determined after 6 and 12 weeks of treatment. (b) Organ weight was determined after necropsy at week 12. The distribution of (c) triglycerides and (d) cholesterol over lipoproteins was determined at week 12 in fasted plasma samples that were pooled per group. Values are means  $\pm$  S.E.M. (n=8-11 per group). \*\* $P$ <0.01, \*\*\* $P$ <0.001 (unpaired two-tailed Student's t-test).

**Supplementary Table 1.  $\beta$ 3-AR agonism does not alter hepatic expression of genes involved in lipid and lipoprotein metabolism<sup>1-3</sup>**

| Gene        | <i>E3L.CETP</i> |             | <i>Apoe</i> <sup>-/-</sup> |             | <i>Ldlr</i> <sup>-/-</sup> |             |
|-------------|-----------------|-------------|----------------------------|-------------|----------------------------|-------------|
|             | Vehicle         | CL316243    | Vehicle                    | CL316243    | Vehicle                    | CL316243    |
| <i>Apob</i> | 1.00 ± 0.06     | 1.02 ± 0.07 | 1.00 ± 0.02                | 1.09 ± 0.03 | 1.00 ± 0.03                | 1.10 ± 0.04 |
| <i>CETP</i> | 1.00 ± 0.17     | 1.09 ± 0.18 | n.d.                       | n.d.        | n.d.                       | n.d.        |
| <i>Ldlr</i> | 1.00 ± 0.08     | 0.87 ± 0.02 | 1.00 ± 0.10                | 0.82 ± 0.08 | n.d.                       | n.d.        |
| <i>Mttp</i> | 1.00 ± 0.06     | 1.19 ± 0.21 | 1.00 ± 0.05                | 0.96 ± 0.05 | 1.00 ± 0.07                | 0.98 ± 0.06 |

<sup>1</sup> mRNA expression is expressed as fold change as compared to vehicle mice.

<sup>2</sup> *Apob*, apolipoprotein B; *CETP*, cholesteryl ester transfer protein; *Ldlr*, low-density lipoprotein receptor; *Mttp*, microsomal triglyceride transfer protein.

<sup>3</sup> Statistical differences were assessed with unpaired two-tailed Student's t-test. (n=5-8). N.d., not determined.

**Supplementary Table 2. List of primer sequences qRT-PCR<sup>1</sup>**

| <b>Gene</b>                    | <b>Forward primer</b>  | <b>Reverse Primer</b>    |
|--------------------------------|------------------------|--------------------------|
| <b><i>36b4</i></b>             | GGACCCGAGAAGACCTCCTT   | GCACATCACTCAGAATTTCAATGG |
| <b><i>Apob</i></b>             | GCCCATTGTGGACAAGTTGATC | CCAGGACTTGGAGGTCTTGGA    |
| <b><i>β2-microglobulin</i></b> | TGACCGGCTTGTATGCTATC   | CAGTGTGAGCCAGGATATAG     |
| <b><i>CETP</i></b>             | CAGATCAGCCACTTGTCCAT   | CAGCTGTGTGTTGATCTGGA     |
| <b><i>Ldlr</i></b>             | GCATCAGCTTGGACAAGGTGT  | GGGAACAGCCACCATTGTTG     |
| <b><i>Mttp</i></b>             | CTCTTGGCAGTGCTTTTTCTCT | GAGCTTGTATAGCCGCTCATT    |

<sup>1</sup> *Apob*, apolipoprotein B; *CETP*, cholesteryl ester transfer protein; *Ldlr*, low-density lipoprotein receptor; *Mttp*, microsomal triglyceride transfer protein.
